# Supplementary material
Source: PubMed Central journal article supplement (PMC6275976)
Supplement: 11658_2012_3_MOESM1_ESM.pdf [file 11658_2012_3_MOESM1_ESM.pdf]

Supplementary material

**DIFFERENTIAL FUCOSYLTRANSFERASE IV EXPRESSION  
IN SQUAMOUS CARCINOMA CELLS IS REGULATED  
BY PROMOTER METHYLATION**

HONGYAN LI<sup>1,2</sup>, SHAOMING TONG<sup>1,2</sup>, JIWEI LIU<sup>3</sup>, LI HAN<sup>1</sup>, XUESONG YANG<sup>1</sup>, HESHENG HOU<sup>2</sup>, QIU YAN<sup>1</sup> and XIAO-QI WANG<sup>4</sup>

<sup>1</sup>Department of Biochemistry and Molecular Biology, Dalian Medical University, Dalian, Liaoning, People's Republic of China, <sup>2</sup>Department of Biology, Liaoning Normal University, Dalian, Liaoning, People's Republic of China, <sup>3</sup>Department of Oncology, 1st Affiliated Hospital of Dalian Medical University, Dalian, Liaoning, People's Republic of China <sup>4</sup>Departments of Dermatology and Pediatrics, Northwestern University's Feinberg School of Medicine, Chicago, Illinois, USA

Supplemental Table: Conditions and primers of routine RT-PCR, real-time PCR, MSP and BSP

|                     | Denaturation   | Cycles                                            | Extension       | Primers                                                                                |
|---------------------|----------------|---------------------------------------------------|-----------------|----------------------------------------------------------------------------------------|
| FUT4<br>(RT-PCR)    | 94°C,<br>4 min | 28 cycles<br>94°C, 58°C, 72°C,<br>50 s 50 s 50 s  | 72°C,<br>10 min | F: 5'-CGGACGTCTTTGTGCCTTAT-3'<br>R: 5'-CGAGGAAAAGCAGGTACGAG-3'                         |
| β-actin<br>(RT-PCR) | 94°C,<br>4 min | 24 cycles<br>94°C, 58°C, 72°C,<br>50 s 50 s 50 s  | 72°C,<br>10 min | F: 5'-ATCTGGCACCACACCTTCTACAATGAGCTGCG-3'<br>R: 5'-CGTCATACTCCTGCCTGCTGATCCACATCTGC-3' |
| FUT4<br>(qPCR)      | 95°C,<br>30 s  | 45 cycles<br>95°C, 60°C,<br>5 s 10 s              |                 | F: 5'-CTCAGGCCGTGCTTTTCCA-3'<br>R: 5'-GTAGTCCAACACGCGCAGAT-3'                          |
| GAPDH<br>(qPCR)     | 95°C,<br>30 s  | 45 cycles<br>95°C, 60°C,<br>5 s 10 s              |                 | F: 5'-ATGGGGAAGGTGAAGGTCG-3'<br>R: 5'-GGGGTCATTGATGGCAACAATA-3'                        |
| MSP M<br>pair       | 94°C,<br>5 min | 35 cycles<br>94°C, 48°C, 72°C,<br>30 s 1 min 30 s | 72°C,<br>10 min | F: 5'-CGGGTTGTTTTATAATTCGATC-3'<br>R: 5'-AATAACGTCGACTTCCTACCGT-3'                     |
| U<br>pair           | 94°C,<br>5 min | 35 cycles<br>94°C, 45°C, 72°C,<br>30 s 1 min 30 s | 72°C,<br>10 min | F: 5'-TGGGTTGTTTTATAATTTGATTGT-3'<br>R: 5'-AAAATAACATCAACTTCCTACCATT-3'                |
| BSP                 | 94°C,<br>5 min | 35 cycles<br>94°C, 48°C, 72°C,<br>30 s 1 min 30 s | 72°C,<br>10 min | F: 5'-TTAAATGTAGAGATTTTGAAGGTTA-3'<br>R: 5'-CAAAAACAAACCCTAAAACAAAC-3'                 |
